# Supplementary material
Source: Royal Society of Chemistry journal article supplement (doi:10.1039/d6nr00210b)
Supplement: d6nr00210b1.pdf [file d6nr00210b1.pdf]

## Kinetically Controlled Self-assembly of Atom-Precise Gold Nanoclusters into Multicolor Emissive Supramolecular Assemblies

Mengting Zhang,<sup>†a</sup> Yin Wang,<sup>†a</sup> and Lina Yang<sup>\*a</sup>

<sup>a</sup> School of Food and Biological Engineering, Hefei University of Technology, Hefei, 230009, Anhui, P.R. China. E-mail: yangln@mail.ustc.edu.cn

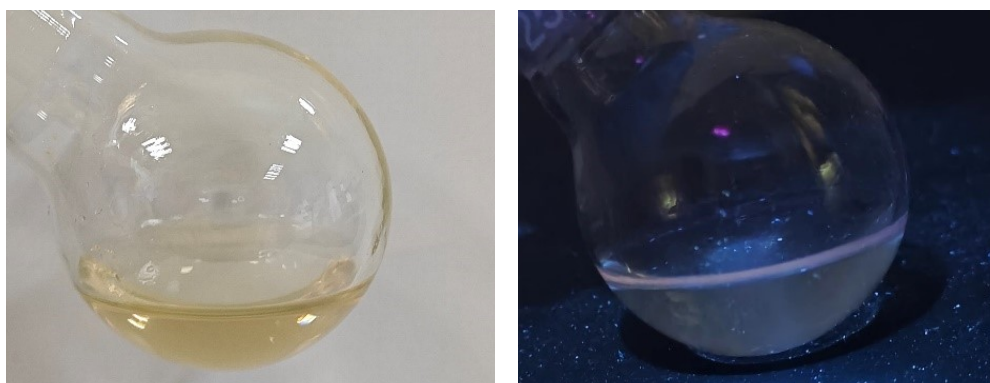

**Figure S1.** Sample solution of individual Au<sub>5</sub> NCs under visible and UV light irradiations.

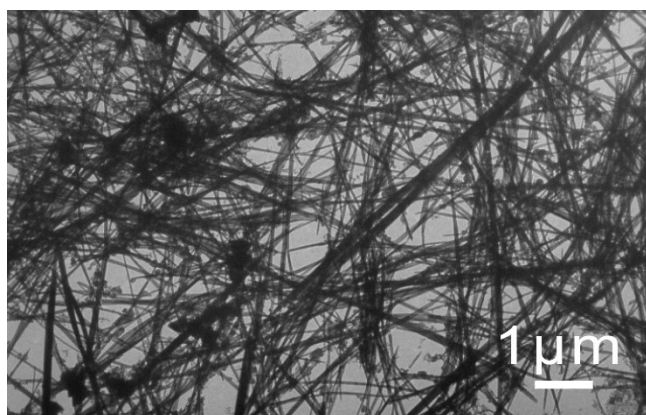

**Figure S2.** TEM image of Au<sub>5</sub> NCs self-assembly.

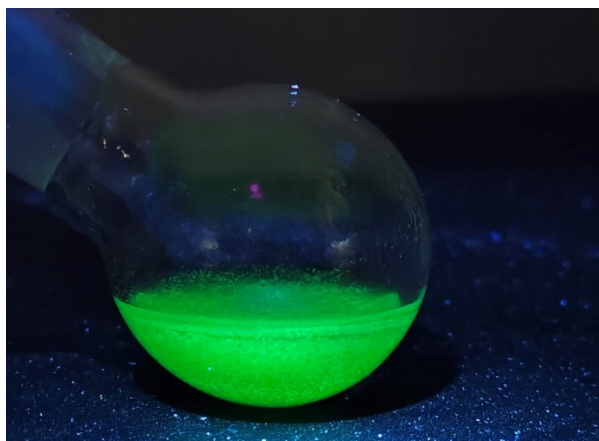

**Figure S3.** The sample solution of Au<sub>5</sub> NCs self-assembly under UV light irradiation.

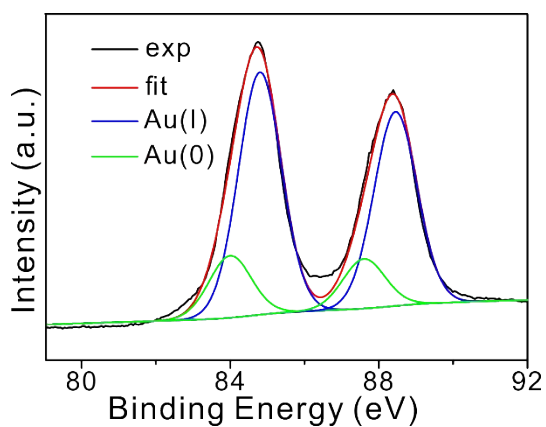

**Figure S4.** XPS spectra of Au<sub>5</sub> NCs self-assembly with fitting results. The Au(0)/Au(I) ratio was 1/4.

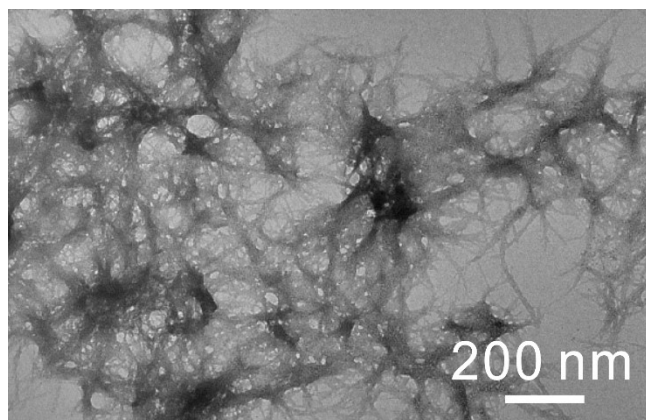

**Figure S5.** TEM image of the reaction products at 1 h in the Au<sub>5</sub> self-assembly system by adding 1 M of MgCl<sub>2</sub> for further reaction for 2 h.

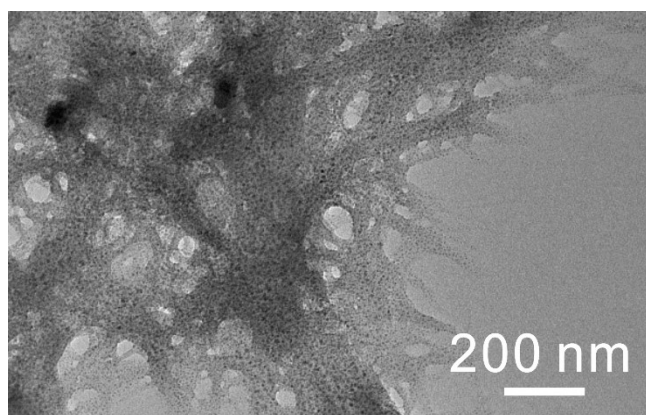

**Figure S6.** TEM image of the reaction products at 1 h in the Au<sub>5</sub> self-assembly system by adjusting the pH to 6 for further reaction for 2 h.

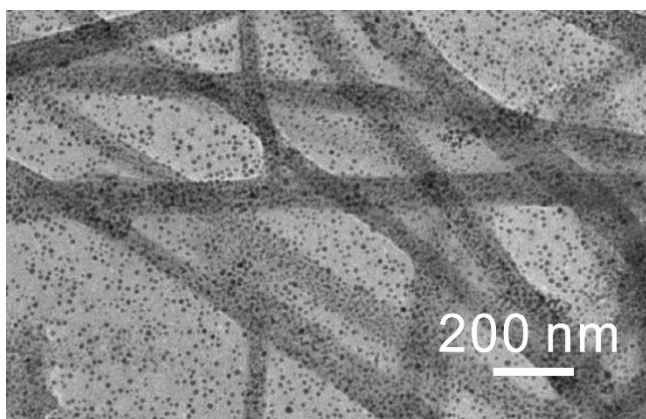

**Figure S7.** TEM image of the products by using mercaptoethylamine for ligand exchange with DMP ligand at the reaction time of 3 h in the Au<sub>5</sub> self-assembly system.

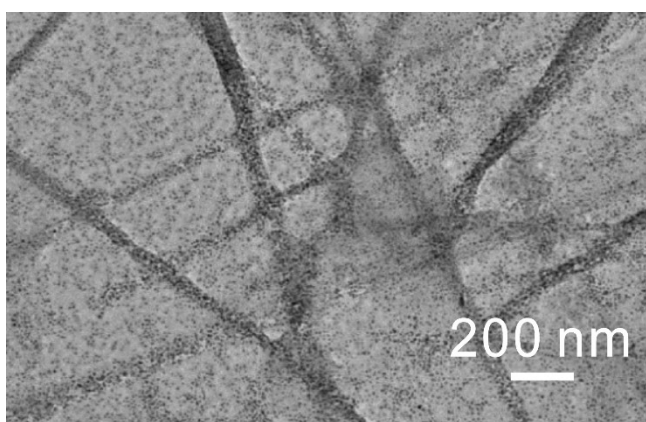

**Figure S8.** TEM image of the products at the reaction time of 3 h in the Au<sub>5</sub> self-assembly system for further reaction at 60°C for 1 h.

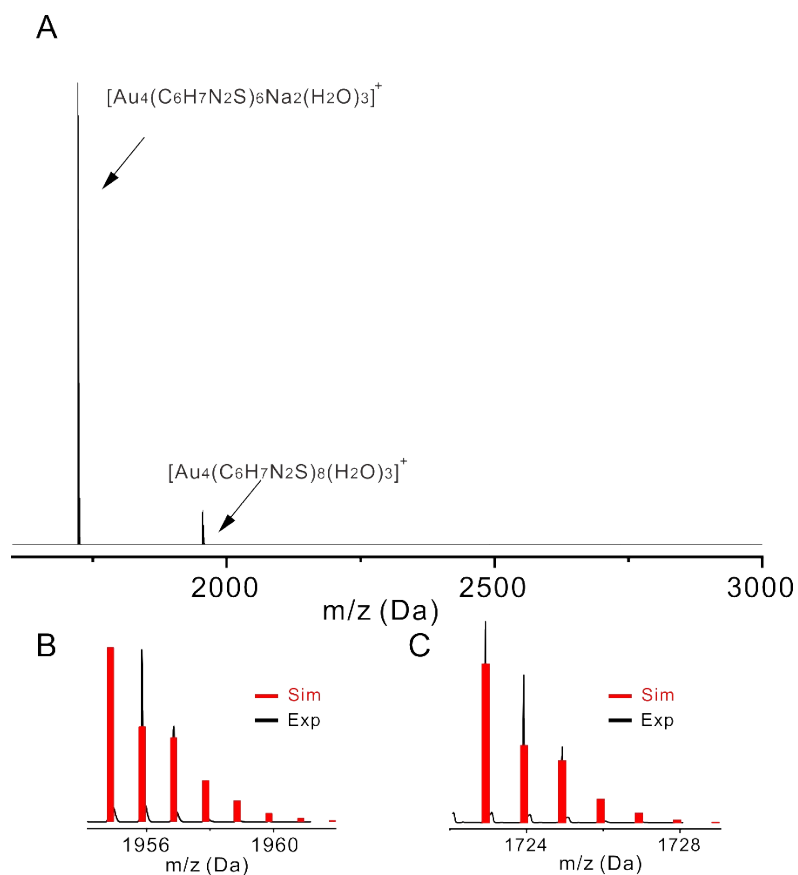

**Figure S9.** ESI-MS of the individual  $\text{Au}_4$  NCs synthesized in the modified self-assembly systems.

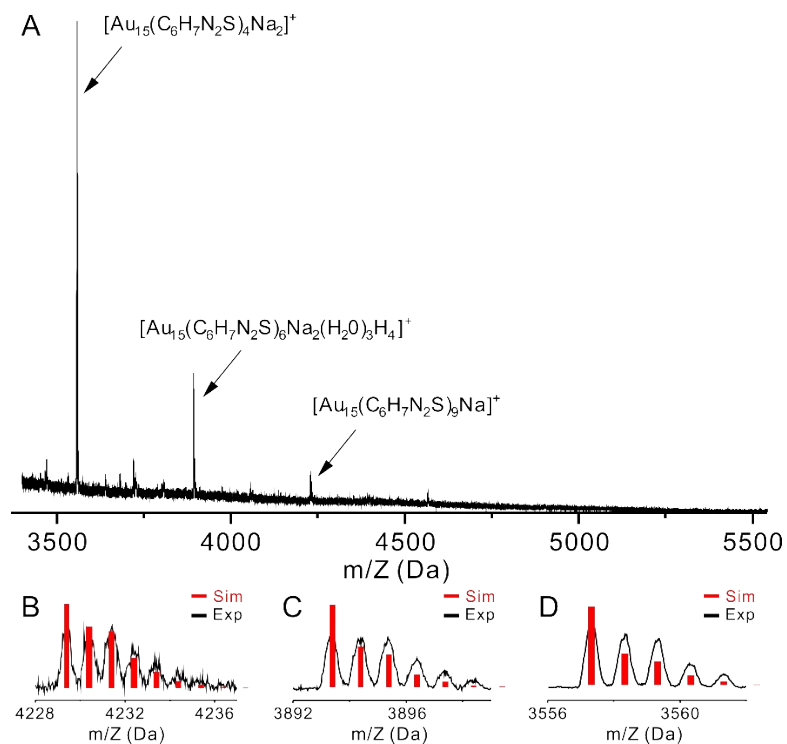

**Figure S10.** ESI-MS of the individual  $\text{Au}_{15}$  NCs synthesized in the modified self-assembly systems.

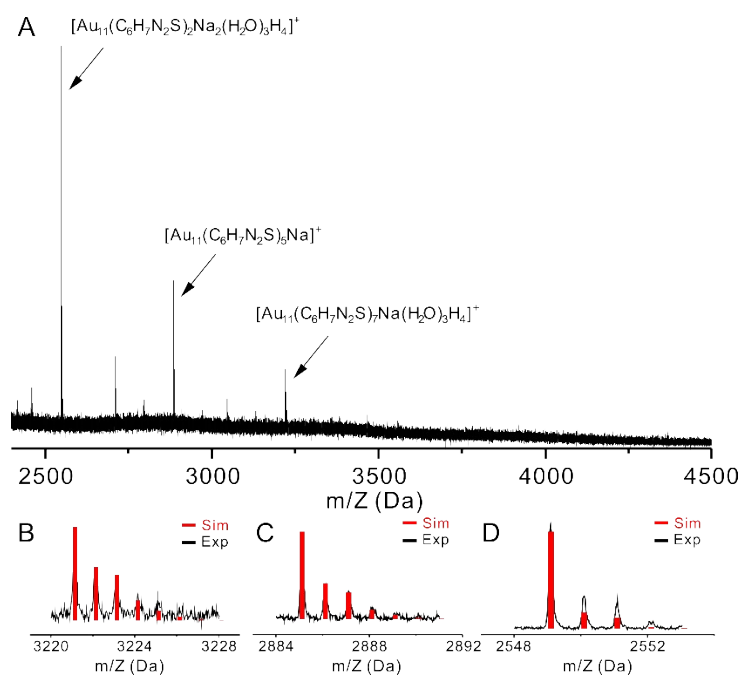

**Figure S11.** ESI-MS of the individual  $\text{Au}_{11}$  NCs synthesized in the modified self-assembly systems.

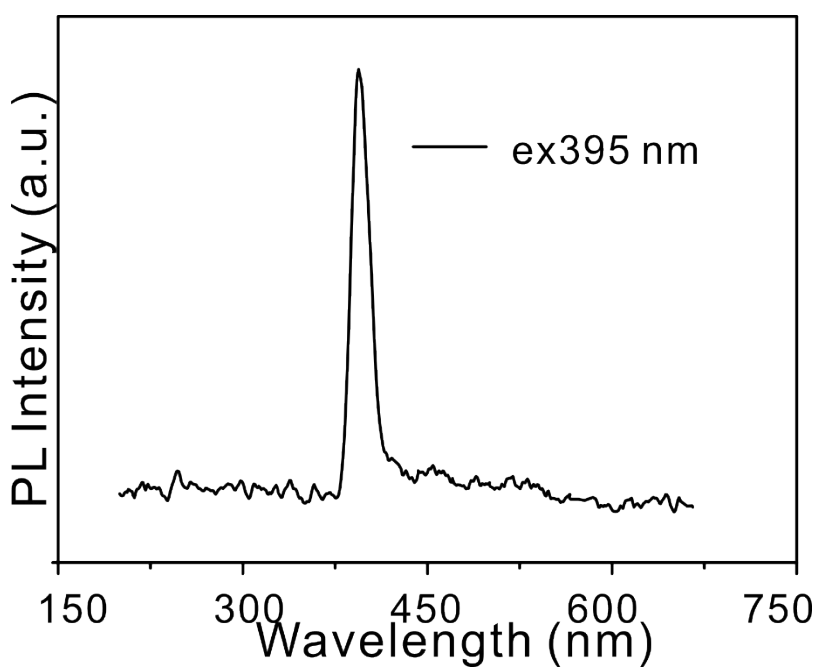

**Figure S12.** PL spectra of the individual  $\text{Au}_4$  NCs.

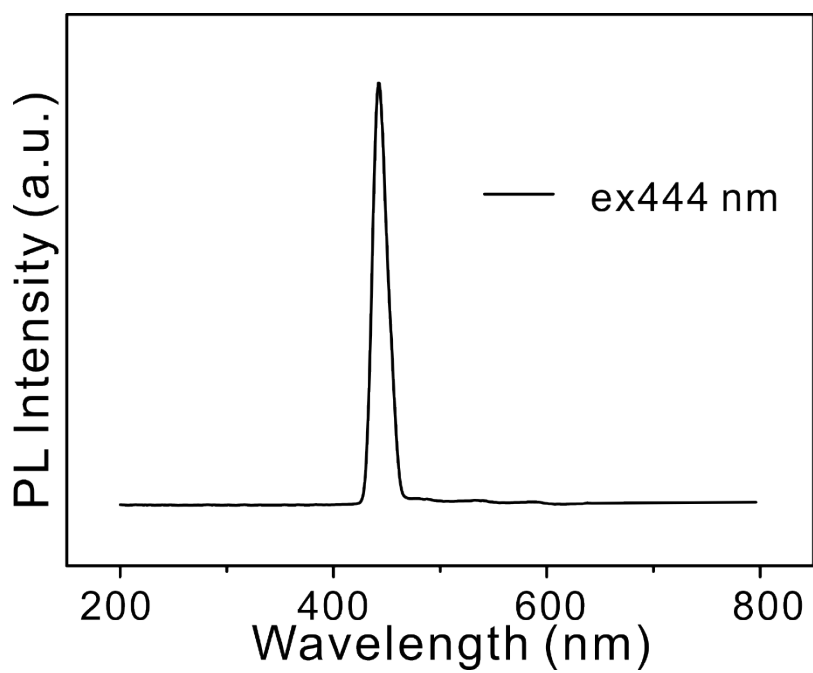

Figure S13. PL spectra of the individual Au<sub>15</sub> NCs.

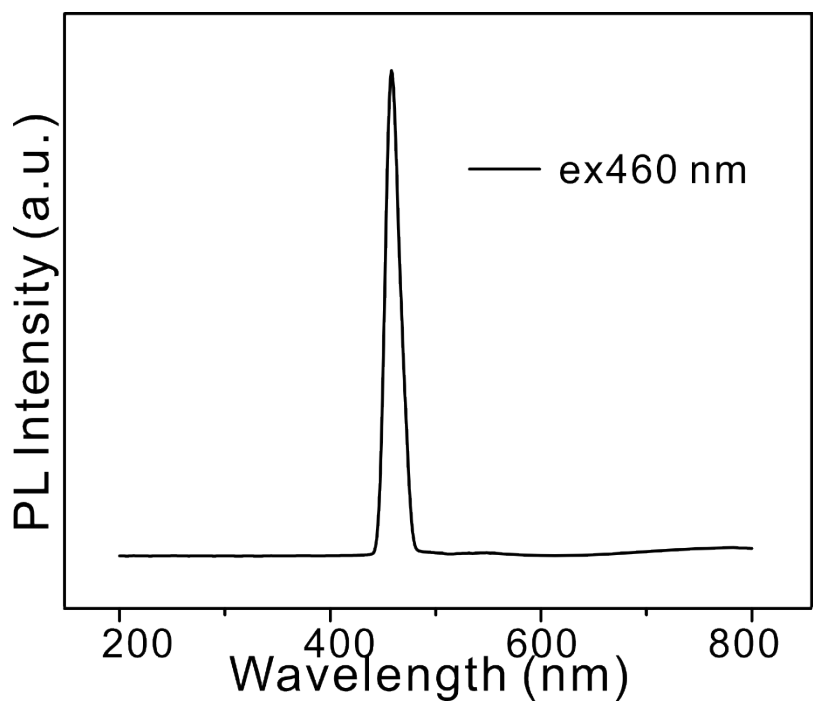

Figure S14. PL spectra of the individual Au<sub>11</sub> NCs.

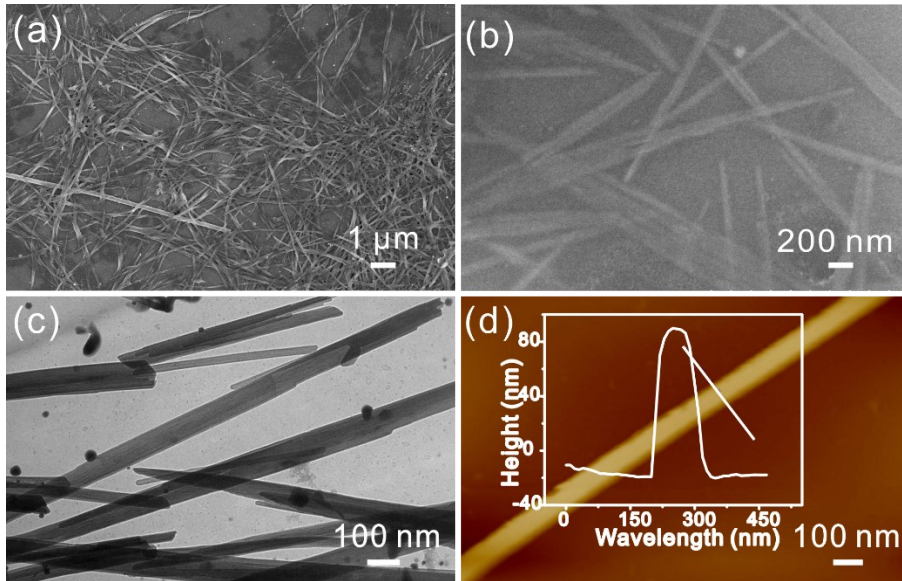

**Figure S15.** The morphological characterizations for Au<sub>4</sub> NCs self-assembly. (a-b) SEM images at different magnifications. (c) TEM image. (d) AFM image. Inset: height profile along the indicated line.

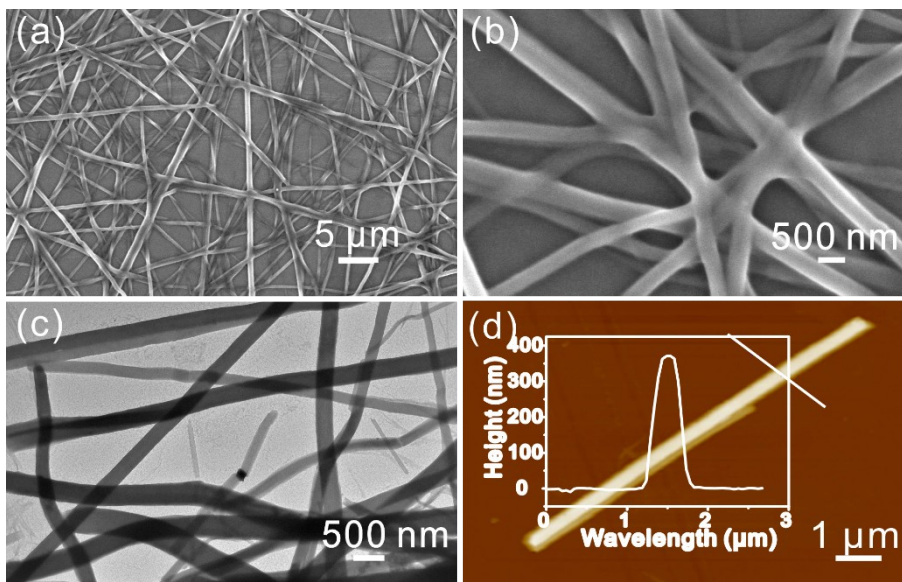

**Figure S16.** The morphological characterizations for Au<sub>15</sub> NCs self-assembly. (a-b) SEM images at different magnifications. (c) TEM image. (d) AFM image. Inset: height profile along the indicated line.

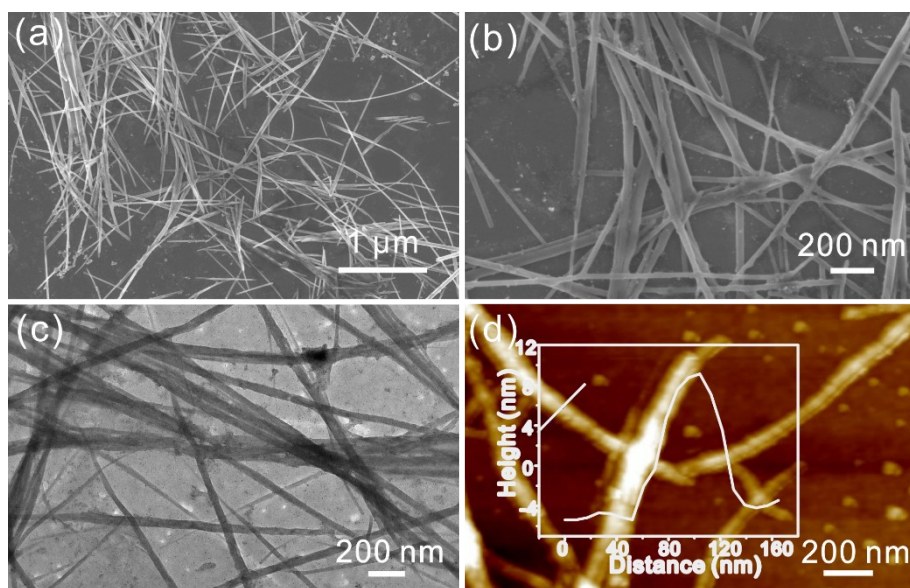

**Figure S17.** The morphological characterizations for Au<sub>11</sub> NCs self-assembly. (a-b) SEM images at different magnifications. (c) TEM image. (d) AFM image. Inset: height profile along the indicated line.

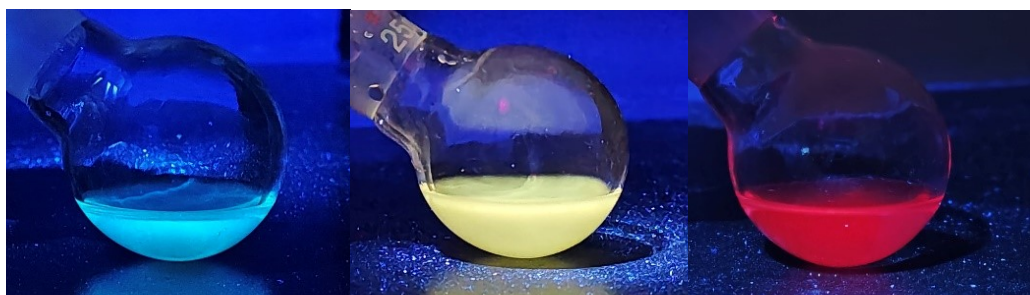

**Figure S18.** The sample solutions of the self-assembly products of Au<sub>4</sub> NCs, Au<sub>15</sub> NCs and Au<sub>11</sub> NCs under UV light irradiation.

**Table S1.** PL lifetimes of the four kinds of nanofibers with fitting data.

|                      | $\lambda_{ex}$<br>(nm) | $\lambda_{em}$<br>(nm) | B1(%) | $\tau_1$<br>( $\mu s$ ) | B2(%) | $\tau_2$<br>( $\mu s$ ) | Tavg<br>( $\mu s$ ) | $\chi^2$ |
|----------------------|------------------------|------------------------|-------|-------------------------|-------|-------------------------|---------------------|----------|
| Au <sub>4</sub> NCs  | 395                    | 460                    | 64.71 | 1.959                   | 35.29 | 11.001                  | 5.14                | 1.070    |
| Au <sub>5</sub> NCs  | 453                    | 530                    | 66.56 | 1.377                   | 33.44 | 9.654                   | 4.14                | 0.990    |
| Au <sub>15</sub> NCs | 444                    | 590                    | 62.64 | 2.240                   | 37.36 | 8.673                   | 4.64                | 0.802    |
| Au <sub>11</sub> NCs | 460                    | 670                    | 64.38 | 1.436                   | 35.62 | 9.516                   | 4.31                | 0.804    |
